# Supplementary material for: 20-year trends of distal femoral, patellar, and proximal tibial fractures: a Danish nationwide cohort study of 60,823 patients
Source: PubMed Central journal article supplement (PMC7006734; doi:10.1080/17453674.2019.1698148), 2019-12-04
Supplement: IORT_A_1698148_SM1128.pdf [file IORT_A_1698148_SM1128.pdf]

## Supplementary data

### Appendix

#### ICD-10 diagnosis codes

**Concomitant near-knee fractures:** DS720 (femoral neck fracture), DS721 (perthrochanteric femoral fracture), DS722 (subtrochanteric femoral fracture), DS723 (femoral shaft fracture), DS727 (multiple femoral fractures), DS728 (other femoral fracture), DS729 (femoral fracture, other, not otherwise specified), DS822 (tibial shaft fracture), DS823 (distal tibia fracture), DS824 (fibula shaft fracture), DS825 (medial malleolar fracture), DS826 (lateral malleolar fracture), DS827 (multiple fractures of the knee and lower knee), DS828 (fracture of other part of lower leg) and DS829 (fracture of lower leg, other, not otherwise specified).

**Concomitant fractures:** DS122 (fracture of cervical spine), DS127 (multiple fractures of cervical spine), DS22 (fracture of costae, sternum or thoracic spine), DS32 (fracture of lumbar spine or pelvis), DS42 (shoulder and/or upper arm fracture), DS52 (elbow and/or lower arm fracture), DS62 (wrist and/or hand fracture), DT021 (fractures in thorax, lumbar spine and pelvis), DT027 (fractures in thorax, lumbar spine, pelvis, upper and lower extremities) and DT08 (fracture of spine, not otherwise specified).

**Lesions inside the knee:** DS83 (luxation and distortion of joint and ligaments in knee).

**Primary knee osteoarthritis (OA):** DM170 (primary bilateral knee OA), DM171 (primary unilateral knee OA) and DM179 (knee OA other, not otherwise specified).

**Osteoporosis:** DM81 (osteoporosis without pathological fracture).

**Proximal tibial fracture:** DS821.

**Patellar fracture:** DS820.

**Distal femoral fracture:** DS724.

**Femoral shaft fracture:** DS723.

**Tibial shaft fracture:** DS822.

#### NOMESCO surgery codes

**External fixation codes:** KNFJ25 (external fixation of fracture in distal femur), KNGJ20 (external fixation of fracture in patella), KNGJ21 (external fixation of fracture in proximal tibia) and KNGJ29 (external fixation of fracture in knee, not otherwise specified).

**Knee arthroplasty codes:** KNGB (primary prosthesis in the knee), KNGC (secondary prosthesis in the knee) and KNGG (joint resections, arthroplasties and arthrodeses in knee joint).

#### Open reduction internal fixation (ORIF), external fixation and reduction codes:

##### Distal femur:

KNFJ0 closed reduction of femur fracture  
 KNFJ05 closed reduction of fracture in distal femur  
 KNFJ1 open reduction of femur fracture  
 KNFJ15 open reduction of fracture in distal femur  
 KNFJ2 external fixation of femur fracture  
 KNFJ25 external fixation of fracture in distal femur  
 KNFJ3 internal fixation with bio implants of femur fracture  
 KNFJ35 internal fixation with bio implants of fracture in distal femur  
 KNFJ4 internal fixation with wires, rods, cerclage wiring or pins/needles of femur fracture  
 KNFJ45 internal fixation with wires, rods, cerclage wiring or pins/needles of fracture in distal femur  
 KNFJ5 internal fixation with intramedullary nail of femur fracture  
 KNFJ55 internal fixation with intramedullary nail of fracture in distal femur  
 KNFJ6 internal fixation with plate and screws of femur fracture  
 KNFJ65 internal fixation with plate and screws of fracture in distal femur  
 KNFJ7 internal fixation with screws only of femur fracture  
 KNFJ75 internal fixation with screws only of fracture in distal femur  
 KNFJ8 internal fixation with other or combined method of fracture in femur  
 KNFJ85 internal fixation with other or combined method of fracture in distal femur  
 KNFJ9 other surgical fracture treatment in femur  
 KNFJ95 other surgical fracture treatment in distal femur  
 KNGF2 fixation of articular surface fragment in knee joint

##### Patella/proximal tibia:

KNGJ fracture treatment in knee and lower leg  
 KNGJ0 closed reduction of fracture in knee  
 KNGJ00 closed reduction of fracture in patella  
 KNGJ01 closed reduction of fracture in proximal tibia  
 KNGJ09 closed reduction of fracture in knee, not otherwise specified  
 KNGJ1 open reduction of fracture in knee  
 KNGJ10 open reduction of fracture in patella  
 KNGJ11 open reduction of fracture in proximal tibia  
 KNGJ19 open reduction of fracture in knee, not otherwise specified

- KNGJ2 external fixation of fracture in knee  
 KNGJ20 external fixation of fracture in patella  
 KNGJ21 external fixation of fracture in proximal tibia  
 KNGJ29 external fixation of fracture in knee, not otherwise specified  
 KNGJ3 internal fixation with bio implants of fracture in knee  
 KNGJ30 internal fixation with bio implants of fracture in patella  
 KNGJ31 internal fixation with bio implants of fracture in proximal tibia  
 KNGJ39 internal fixation with bio implants of fracture in knee, not otherwise specified  
 KNGJ4 internal fixation with wires, rods, cerclage wiring or pins/needles of fracture in knee  
 KNGJ40 internal fixation with wires, rods, cerclage wiring or pins/needles of fracture in patella  
 KNGJ41 internal fixation with wires, rods, cerclage wiring or pins/needles of fracture in proximal tibia  
 KNGJ49 internal fixation with wires, rods, cerclage wiring or pins/needles of fracture in knee, not otherwise specified  
 KNGJ5 internal fixation with intramedullary nail of fracture in knee  
 KNGJ51 internal fixation with intramedullary nail of fracture in proximal tibia  
 KNGJ59 internal fixation with intramedullary nail of fracture in knee, not otherwise specified  
 KNGJ6 internal fixation with plate and screws of fracture in knee  
 KNGJ60 internal fixation with plate and screws of fracture in patella  
 KNGJ61 internal fixation with plate and screws of fracture in proximal tibia  
 KNGJ69 internal fixation with plate and screws of fracture in knee, not otherwise specified  
 KNGJ7 internal fixation with screws only of fracture in knee  
 KNGJ70 internal fixation with screws only of fracture in patella  
 KNGJ71 internal fixation with screws only of fracture in proximal tibia  
 KNGJ79 internal fixation with screws only of fracture in knee, not otherwise specified  
 KNGJ8 internal fixation with other or combined method of fracture in knee  
 KNGJ80 internal fixation with other or combined method of fracture in patella  
 KNGJ81 internal fixation with other or combined method of fracture in proximal tibia  
 KNGJ89 internal fixation with other or combined method of fracture in knee, not otherwise specified  
 KNGJ9 other surgical fracture treatment in knee  
 KNGJ90 other surgical fracture treatment in patella  
 KNGJ91 other surgical fracture treatment in proximal tibia  
 KNGJ99 other surgical fracture treatment in knee, not otherwise specified

**Table 1.** Annual incidence rates per 10<sup>5</sup> inhabitants with 95% confidence intervals (IR (CI)) and incidence rate ratios (IRR (CI)) for the study population registered in the DNPR during 1998–2017

| Year | IR (CI)          | IRR (CI)         |
|------|------------------|------------------|
| 1998 | 64.0 (61.9–66.2) | reference        |
| 1999 | 64.9 (62.8–67.1) | 1.01 (0.97–1.06) |
| 2000 | 63.5 (61.4–65.6) | 0.99 (0.94–1.04) |
| 2001 | 60.3 (58.2–62.4) | 0.94 (0.90–0.99) |
| 2002 | 61.3 (59.3–63.5) | 0.96 (0.91–1.00) |
| 2003 | 60.2 (58.2–62.3) | 0.94 (0.90–0.99) |
| 2004 | 60.6 (58.6–62.8) | 0.95 (0.90–0.99) |
| 2005 | 61.0 (59.0–63.2) | 0.95 (0.91–1.00) |
| 2006 | 59.3 (57.3–61.4) | 0.93 (0.88–0.97) |
| 2007 | 59.6 (57.6–61.7) | 0.93 (0.89–0.98) |
| 2008 | 59.2 (57.1–61.2) | 0.92 (0.88–0.97) |
| 2009 | 59.8 (57.8–61.9) | 0.93 (0.89–0.98) |
| 2010 | 64.8 (62.8–67.0) | 1.01 (0.97–1.06) |
| 2011 | 62.5 (60.5–64.6) | 0.97 (0.93–1.02) |
| 2012 | 63.2 (61.1–65.3) | 0.99 (0.94–1.03) |
| 2013 | 63.3 (61.2–65.4) | 0.99 (0.94–1.04) |
| 2014 | 62.6 (60.6–64.8) | 0.98 (0.93–1.03) |
| 2015 | 65.9 (63.8–68.1) | 1.03 (0.98–1.08) |
| 2016 | 66.4 (64.3–68.5) | 1.04 (0.99–1.09) |
| 2017 | 70.0 (67.9–72.2) | 1.09 (1.04–1.15) |

DNPR = Danish National Patient Registry.

Table 2. Demographic data on the study population (N = 60,823) registered in the DNPR during 1998–2017. Values are frequency (%) unless otherwise specified

| Patient demographics             | Year       |             |             |             |            |
|----------------------------------|------------|-------------|-------------|-------------|------------|
|                                  | 1998       | 1999–2004   | 2005–2010   | 2011–2016   | 2017       |
| Patients, total no.              | 3,262      | 17,623      | 17,557      | 18,870      | 3,511      |
| Age, median (IQR)                | 54 (33–73) | 55 (33–74)  | 55 (30–72)  | 56 (27–71)  | 57 (27–72) |
| Female sex                       | 1,800 (55) | 9,804 (56)  | 9,875 (56)  | 11,012 (58) | 2,073 (59) |
| Charlson co-morbidity index      |            |             |             |             |            |
| Zero (CCI = 0)                   | 2,710 (83) | 13,729 (78) | 12,784 (73) | 13,303 (71) | 2,491 (71) |
| Low (CCI = 1)                    | 169 (5)    | 1,186 (7)   | 1,482 (8)   | 1,788 (10)  | 355 (10)   |
| Medium (CCI = 2)                 | 229 (7)    | 1,601 (9)   | 1,757 (10)  | 2,056 (11)  | 368 (11)   |
| High (CCI ≥ 3)                   | 154 (5)    | 1,107 (6)   | 1,534 (9)   | 1,723 (9)   | 297 (9)    |
| Other diagnoses                  |            |             |             |             |            |
| Concomitant near-knee fractures  | 666 (20)   | 3,970 (23)  | 3,763 (21)  | 3,293 (18)  | 448 (13)   |
| Concomitant fractures            | 390 (12)   | 2,314 (13)  | 2,355 (13)  | 2,259 (12)  | 269 (8)    |
| Lesions inside the knee          | 303 (9)    | 1,767 (10)  | 1,826 (10)  | 2,034 (11)  | 315 (9)    |
| Primary knee OA                  | 116 (4)    | 789 (5)     | 786 (5)     | 708 (4)     | 63 (2)     |
| Osteoporosis                     | 76 (2)     | 571 (3)     | 879 (5)     | 1,128 (6)   | 102 (3)    |
| Knee fractures, total no.        | 3,487      | 20,391      | 20,257      | 22,133      | 4,104      |
| Knee fracture type               |            |             |             |             |            |
| Proximal tibia                   | 1,613 (46) | 9,342 (46)  | 9,643 (48)  | 11,622 (53) | 2,126 (52) |
| Patella                          | 1,242 (36) | 6,913 (34)  | 6,653 (33)  | 6,627 (30)  | 1,254 (31) |
| Distal femur                     | 632 (18)   | 4,136 (20)  | 3,961 (20)  | 3,884 (18)  | 724 (18)   |
| Inhabitants at risk <sup>a</sup> | 5,220,478  |             |             |             | 5,722,369  |

DNPR = Danish National Patient Registry. IQR = interquartile range.  
<sup>a</sup> Total number of inhabitants at risk in the specific calendar period.
